# Supplementary material for: Ground-based vertical profile observations of atmospheric composition on the Tibetan Plateau (2017–2019)
Source: Copernicus journal article supplement (doi:10.5194/essd-2021-195), 2021-06-21
Supplement: Supplementary file 1 [file essd-2021-195-supplement.pdf]

Supplement of

## Ground-based vertical profile observations of atmospheric composition on the Tibetan Plateau (2017-2019)

Chengzhi Xing et al.

Correspondence to: C. L. (chliu81@ustc.edu.cn) and M. G. (mmgao2@hkbu.edu.hk)

**Table S1: Correlation between NO<sub>2</sub> (HCHO) from MAX-DOAS and OMI in different seasons.**

| Slope (R)         | Spring      | Summer    | Autumn      | Winter      |
|-------------------|-------------|-----------|-------------|-------------|
| NO <sub>2</sub> * | Less data   | Less data | 0.99 (0.76) | 1.49 (0.62) |
| HCHO*             | 0.56 (0.35) | Less data | 1.42 (0.56) | 1.06 (0.51) |

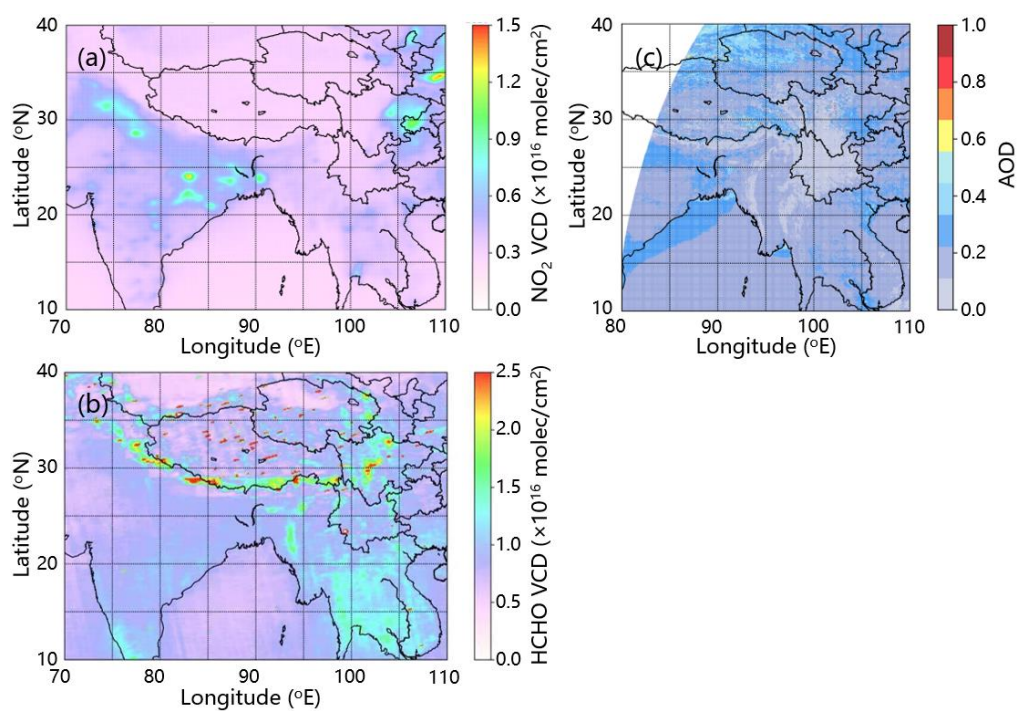

**Figure S1. Averaged spatial distributions of VCDs of (a) NO<sub>2</sub> and (b) HCHO measured by OMI, and (c) AOD measured by Himawari-8 from December 2017 to March 2019.**
